# Supplementary material
Source: Springer Nature journal article supplement (https://www.springermedizin.de/resource/supplementary/12955_2009_650_MOESM6_ESM.pdf/9560998)

(a)  $m^+ / m = 1, \mu_T - \mu_R = 0$ 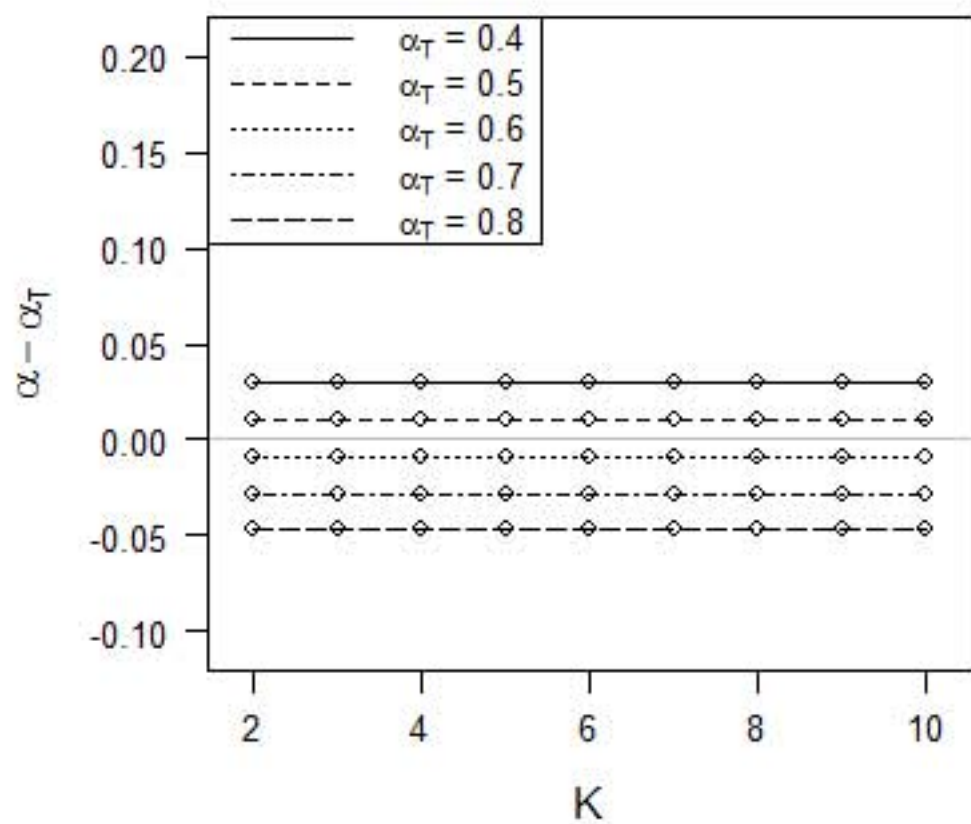(b)  $m^+ / m = 0.5, \mu_T - \mu_R = 0$ 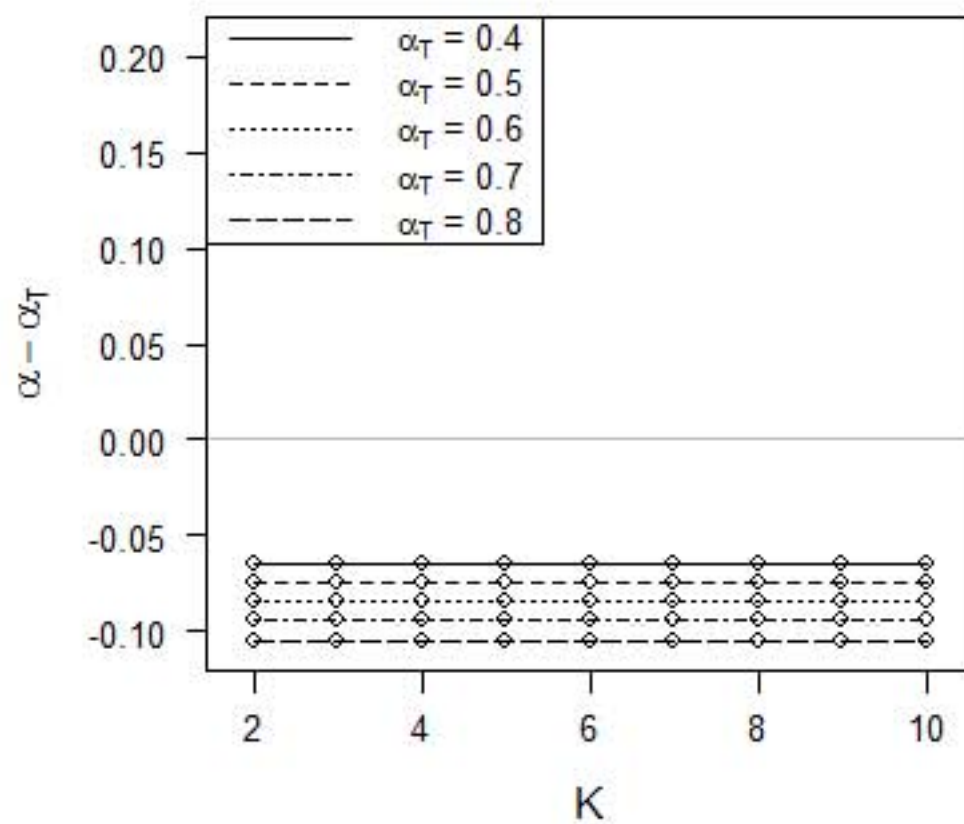(c)  $m^+ / m = 1, \mu_T - \mu_R = 0.2K$ 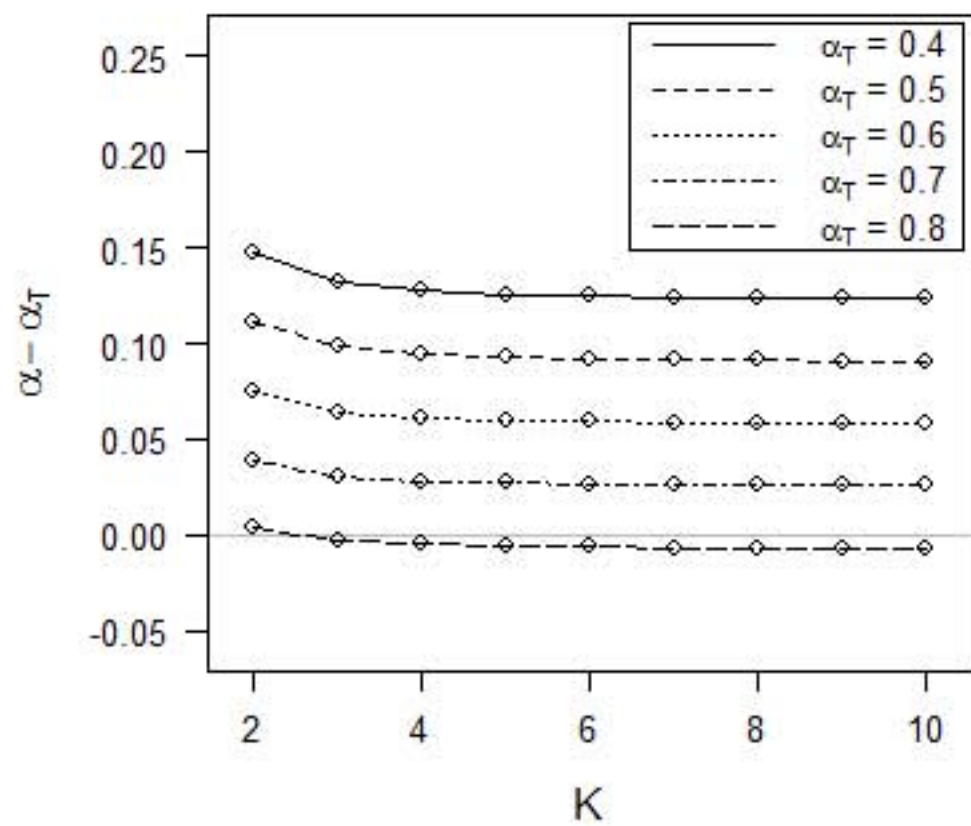(d)  $m^+ / m = 0.5, \mu_T - \mu_R = 0.2K$ 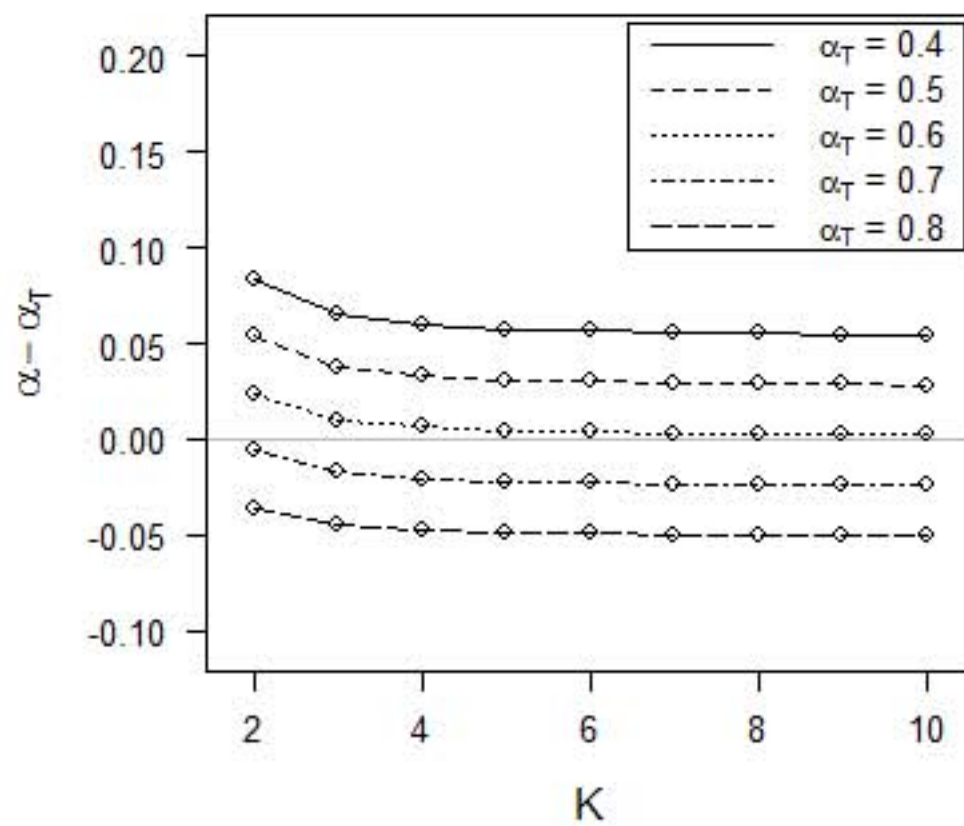

Supplement: MOESM6 [file 9560998]
